# Supplementary material
Source: Springer Nature journal article supplement (https://www.springermedizin.de/resource/supplementary/40170_2014_130_MOESM1_ESM.pdf/25787632)
Supplement: MOESM1 [file 25787632]

## SUPPLEMENTAL INFORMATION

### **Metformin directly acts on mitochondria to alter cellular bioenergetics**

Sylvia Andrzejewski<sup>1,2</sup>, Simon-Pierre Gravel<sup>1,2</sup>, Michael Pollak<sup>3,4,5</sup>, and Julie St-Pierre<sup>1,2†</sup>

### **Supplemental Experimental Procedures**

#### *Acute treatment of cultured cells with metformin and respiration*

For acute treatment with metformin, untreated NT2196 or NMuMG cells were washed in PBS trypsonized and counted as previously described.  $1 \times 10^6$  cells were incubated in a volume of 100  $\mu$ L of respective culture media in a 5% CO<sub>2</sub> incubator at 37°C for a period of 15 minutes. Cells were resuspended every 5 minutes. After 15 minutes respiration was tested as previously mentioned with oligomycin (2.5  $\mu$ g/mL/ $1 \times 10^6$  cells) and myxothiazol (10  $\mu$ M)

#### *Isolation of mitochondria from cultured cells*

Mitochondria were isolated as previously described (Gravel S.P *et al.* 2014) with small modifications. Briefly, cells were cultured, scraped and harvested by centrifugation, resuspended in Buffer A (250 mM sucrose, 10 mM KCl, 1 mM EDTA, 1mM EGTA, 1.5 mM MgCl<sub>2</sub>, 20 mM HEPES, 1% BSA (w/v), pH 7.4) and homogenized with a Wheaton glass pestle to 80% cell lysis. The suspension was centrifuged twice at 1,000g for 7 min and once at 10,000g for 15 min. The pellet was then dissolved in KHEB buffer (120 mM

KCl, 5 mM  $\text{KH}_2\text{PO}_4$ , 3 mM HEPES, 1 mM EGTA and 0.3% BSA (w/v), pH 7.2) and mitochondrial proteins were quantified using a standard Bradford Assay with 1:3 Bradford dye reagent (BioRad).

### ***Incubation of isolated mitochondria and monitored respiration***

For metformin experiments where respiration was monitored over a period of time, mitochondria were isolated from skeletal muscle as previously described, and added to the Clarke Electrode chamber ( $37^\circ\text{C}$ ) at a concentration of 0.6 mg/mL in KHEB Buffer. To determine state 2 respiration rates, 3 mM malate and 3mM pyruvate was added at  $t=0$  min directly to the chamber, along with either ddH<sub>2</sub>O (control), 5 mM or 10 mM metformin. To determine state 4 respiration rates 3 mM malate, 3 mM pyruvate and 2.5  $\mu\text{g/mL}$  oligomycin was added at  $t=0$  directly to the chamber, along with either ddH<sub>2</sub>O (control) or 5 mM metformin. Respiration was then recorded for a period of 15-20 minutes. Respiration rates during the last two minutes of recording were then determined by DigitizeIt Software and GraphPad Prism. These values were then used to determine the fold change from control.
